# Supplementary material for: Green Synthesis of Silver Nanoparticles Using <em>Fructus mori</em> Juice: Characterization and Research of Antioxidant and Antibacterial Properties
Source: Preprints.org preprint supplement (doi:10.20944/preprints202311.0868.v1), 2023-11-14
Supplement: Supplementary file 1 [file Table S1. Particle size of optimized parameters.xlsx]

## Sheet: Sheet1
Reaction parameters	Levels	particle size (nm)
Time (h)	0.5	97.5 ± 3.5ab
	1	104.4 ± 4.5a
	2	92.3 ± 4.6ab
	3	103.1 ± 6.9ab
	4	91.1 ± 2.2b
Temperature (℃)	40	126.3 ± 11.9c
	50	81.3 ± 6.5d
	60	100.7 ± 8.0cd
	70	202.1 ± 11.2b
	80	320.6 ± 20.3a
pH	7	98.8 ± 4.1a
	8	82.2 ± 6.4b
	9	52.6 ± 2.0c
	10	80.7 ± 7.8b
	11	76.5 ± 7.3b
AgNO3 concentration (m moL/L)	10	78.0 ± 2.0b
	20	57.4 ± 2.6c
	40	32.4 ± 0.6d
	60	74.3 ± 0.3b
	80	98.0 ± 6.3a
The data are expressed as mean ± standard deviation. There are significant differences between data that do not share letters.
