# Supplementary material for: Green Synthesis of Silver Nanoparticles Using <em>Fructus mori</em> Juice: Characterization and Research of Antioxidant and Antibacterial Properties
Source: Preprints.org preprint supplement (doi:10.20944/preprints202311.0868.v1), 2023-11-14
Supplement: Supplementary file 2 [file Table S2. DPPH radical clearance rate of M-AgNPs and BHT.xlsx]

## Sheet: Sheet1
Concentration (mg/mL)	DPPH scavenging rate (%)
	M-AgNPs	BHT
0.1	17.33d	68.27a
0.2	29.6c	69.33a
0.4	35.73c	71.73a
0.8	61.07b	69.07a
1.6	79.47a	69.87a
The data are expressed as mean ± standard deviation. There are significant differences between data that do not share letters.
